# Supplementary material for: How to Make Evolution-Proof Insecticides for Malaria Control
Source: PLoS Biol. 2009 Apr 7;7(4):e1000058. doi: 10.1371/journal.pbio.1000058 (PMC3279047; doi:10.1371/journal.pbio.1000058)
Supplement: Table S1 — (10 KB PDF). [file pbio.1000058.st001.pdf]

**Table S1.** Time-dependent insecticides and age-dependent insecticides have equivalent effects on disease transmission and resistance evolution. Comparisons are made at 80% exposure, with mortality occurring 4 cycles after contact (time-dependent insecticide, TDI) or in mosquitoes aged 4 cycles or older (age-dependent insecticide, ADI).

| Cycle number                                                                       |      |      |      |                                                                                                                                                |                                                                                                                                                |                       |     |     |     |     |
|------------------------------------------------------------------------------------|------|------|------|------------------------------------------------------------------------------------------------------------------------------------------------|------------------------------------------------------------------------------------------------------------------------------------------------|-----------------------|-----|-----|-----|-----|
|                                                                                    | C1   | C2   | C3   | C4                                                                                                                                             | C5                                                                                                                                             | C6                    | C7  | C8  | C9  | C10 |
| <i>Time-dependent insecticide</i>                                                  |      |      |      |                                                                                                                                                |                                                                                                                                                |                       |     |     |     |     |
| <p><b>No mortality from treatment, no mosquitoes carrying TDI for 4 cycles</b></p> |      |      |      | <p>Of the mosquitoes surviving to cycle 4, 80% were exposed to TDI in cycle 1, and will now die as a result</p>                                | <p>Of the mosquitoes surviving to cycle 5, 80% were exposed to TDI in cycle 2, and will now die as a result</p>                                | <b>and so on.....</b> |     |     |     |     |
| Mortality in cycle from LLA                                                        | 0.0% | 0.0% | 0.0% | 80%                                                                                                                                            | 80%                                                                                                                                            | 80%                   | 80% | 80% | 80% | 80% |
| <i>Age-dependent insecticide</i>                                                   |      |      |      |                                                                                                                                                |                                                                                                                                                |                       |     |     |     |     |
| <p><b>No mortality from treatment, no mosquitoes 4 cycles or older</b></p>         |      |      |      | <p>Of the mosquitoes surviving to cycle 4, 80% are now exposed to ALI, of which all are 4 cycles of age or older, and will die as a result</p> | <p>Of the mosquitoes surviving to cycle 5, 80% are now exposed to ALI, of which all are 4 cycles of age or older, and will die as a result</p> | <b>and so on.....</b> |     |     |     |     |
| Mortality in cycle from LLA                                                        | 0.0% | 0.0% | 0.0% | 80%                                                                                                                                            | 80%                                                                                                                                            | 80%                   | 80% | 80% | 80% | 80% |
