# Supplementary material for: How to Make Evolution-Proof Insecticides for Malaria Control
Source: PLoS Biol. 2009 Apr 7;7(4):e1000058. doi: 10.1371/journal.pbio.1000058 (PMC3279047; doi:10.1371/journal.pbio.1000058)
Supplement: Table S2 — (24 KB PDF). [file pbio.1000058.st002.pdf]

**Table S2.** Variables and parameters for the Feeding Cycle Model.

| Variable or Parameter                                                                                                                   | Symbol   | Value or Constraints                                                                                                                                             | Source (where relevant) |
|-----------------------------------------------------------------------------------------------------------------------------------------|----------|------------------------------------------------------------------------------------------------------------------------------------------------------------------|-------------------------|
| Base instantaneous mortality rate per day                                                                                               | $r$      | 0.12                                                                                                                                                             | a                       |
| Length of gonotrophic cycle (days)                                                                                                      | $w$      | 2.85                                                                                                                                                             | a                       |
| Time spent host searching and feeding during a cycle (days)                                                                             | $b$      | 1.26                                                                                                                                                             | b                       |
| Time spent finding oviposition site and laying during a cycle (days)                                                                    | $\phi$   | 1.26                                                                                                                                                             | b                       |
| Length of resting period (days)                                                                                                         | $\eta$   | 0.32                                                                                                                                                             | b                       |
| Time required for parasite sporogonic development (days)                                                                                | $d$      | 10.78                                                                                                                                                            | a                       |
| Proportion human population infectious for malaria                                                                                      | $p$      | 0.04                                                                                                                                                             | a,c                     |
| Probability attacks non-human host                                                                                                      | $H$      | 0.17                                                                                                                                                             | a                       |
| Probability killed when attacking host before biting                                                                                    | $a_1$    | 0.05                                                                                                                                                             | d                       |
| Probability killed when attacking host after biting (excluding mortality from insecticide treatments)                                   | $a_2$    | 0.05                                                                                                                                                             | d                       |
| Probability becomes infected with malaria when biting infectious human host                                                             | $M$      | 0.80                                                                                                                                                             |                         |
| Cycle number ( <i>identifies specific cycle in the ten cycles over which average probabilities are tracked in the FCM</i> )             | $i$      | $0 \leq i \leq 10$                                                                                                                                               |                         |
| Probability contacts and is killed by instant action (conventional or age-dependent) treatment when attacking human host, before biting | $k_i$    | for<br>conventional<br>chem<br>$k_i = 0.80$<br>$i=1,2..10$<br>for ALI<br>$k_i = 0$<br>$i < \text{effective age}$<br>$k_i = 0.8$<br>$i \geq \text{effective age}$ |                         |
| Malaria status, the number of whole or partial cycles since infection with malaria                                                      | $m$      | $0 \leq m \leq 10$<br>$m = 0$ means<br>not infected                                                                                                              |                         |
| Differential mortality factor                                                                                                           | $\delta$ | $\delta = 1$ when<br>$m > 0$<br><br>$0 \leq \delta \leq 1$<br>when $m=0$                                                                                         |                         |
| Type of host attacked                                                                                                                   | $h$      | $h=1$ , non-<br>human<br>$h=2$ , non-<br>infectious<br>human                                                                                                     |                         |

| Variable or Parameter                                                                                                                             | Symbol      | Value or Constraints        | Source (where relevant) |
|---------------------------------------------------------------------------------------------------------------------------------------------------|-------------|-----------------------------|-------------------------|
|                                                                                                                                                   |             | $h=3$ ,<br>infectious human |                         |
| Normalised number of eggs laid per successfully laying mosquito per cycle                                                                         | $L$         | 100                         |                         |
| Average normalised number of eggs laid in cycle $i$ by mosquitoes surviving to the start of cycle $i$                                             | $F_i$       |                             |                         |
| Average normalised number of eggs laid in cycle $i$ , by mosquitoes starting cycle $i$ with malaria status $m$                                    | $f_{i,m}$   | $m < i$                     |                         |
| Average probability of survival from start of cycle $i$ to start of cycle $i+1$                                                                   | $S_i$       |                             |                         |
| Average probability that a mosquito starting cycle $i$ with malaria status $m$ , will survive to start of cycle $i+1$                             | $s_{i,m}$   | $m < i$                     |                         |
| Average probability of a mosquito being alive at start of period $i$ .                                                                            | $V_i$       |                             |                         |
| Average probability of a mosquito being alive, with malaria status $m$ at start of period $i$ .                                                   | $v_{i,m}$   | $m < i$                     |                         |
| Probability that a mosquito alive at start of cycle $i$ with malaria status $m$ , survives and bites host type $h$ in cycle $i$                   | $q_{i,m,h}$ | $m < i$                     |                         |
| Probability that a mosquito alive at start of cycle $i$ with malaria status $m$ having survived to bite, then survives to lay eggs                | $z_{i,m}$   | $m < i$                     |                         |
| Average number of infectious bites in cycle $i$ per mosquito alive at the start of cycle $i$                                                      | $I_i$       |                             |                         |
| Average lifetime number of infectious bites per mosquito                                                                                          | $u$         |                             |                         |
| Time, measured in whole units equal to length of sporogonic cycle, from infection of mosquito to cycle from which mosquito gives infectious bites | $D$         | $0 < D \leq 10$             |                         |

- Average value, based on data from four foci of intense malaria [1]
- Assuming  $c.11.1\%$  of every cycle is spent resting (8 hours in a 72 hour cycle), with the rest of the gonotrophic cycle divided equally between laying and feeding
- Derived from overall probability biting human host will result in malaria infection in mosquito [1]
- Based on 0.10 mortality during attack [2], assuming equal probabilities of death before and after a feed.

## References

- Killeen GF, McKenzie FE, Foy BD, Schieffelin C, Billingsley PF, et al. (2000) A simplified model for predicting malaria entomologic inoculation rates based on entomologic and parasitologic parameters relevant to control. *American Journal of Tropical Medicine and Hygiene* 62: 535-544.
- Killeen GF, Smith TA (2007) Exploring the contributions of bed nets, cattle, insecticides, and excitorepellency to malaria control: a deterministic model of mosquito host-seeking behaviour and mortality. *Transactions of the Royal Society of Tropical Medicine and Hygiene* 101: 867-880.
